# Supplementary material for: Targeting hepatocyte MagL regulates the progression of colorectal liver metastases during liver ischemia-reperfusion
Source: Research Square preprint supplement (doi:10.21203/rs.3.rs-2210265/v1), 2022-11-03
Supplement: Supplementary file 1 [file 999541212fbed4fa383aee85.docx]

**Supplementary Table 1:** qRT-PCR primer sequences

| Gene Name | Sequence (5’-3’) |
| --- | --- |
| MagL | Forward: ACCATGCTGTGATGCTCTCTG |
| Reverse: CAAACGCCTCGGGGATAACC |
| CXCL1 | Forward: ACTGCACCCAAACCGAAGTC |
| Reverse: TGGGGACACCTTTTAGCATCTT |
| CXCL2 | Forward: CCAACCACCAGGCTACAGG |
| Reverse: GCGTCACACTCAAGCTCTG |
| CCL2 | Forward: TTAAAAACCTGGATCGGAACCAA |
| Reverse: GCATTAGCTTCAGATTTACGGGT |
| IL10 | Forward: GCTCTTACTGACTGGCATGAG |
| Reverse: CGCAGCTCTAGGAGCATGTG |
| TGF-β | Forward: CTCCCGTGGCTTCTAGTGC |
| Reverse: GCCTTAGTTTGGACAGGATCTG |
| CX3CL1 | Forward: CTGCCCTCACTAAAAATGGTGG |
| Reverse: AATGTGGCGGATTCAGGCTT |
| CD206 | Forward: CAGGTGTGGGCTCAGGTAGT |
| Reverse: TGTGGTGAGCTGAAAGGTGA |
| Arg1 | Forward: CTCCAAGCCAAAGTCCTTAGAG |
| Reverse: AGGAGCTGTCATTAGGGACATC |
| Mertk | Forward: CTCCTGAGCCCGTCAATATCT |
| Reverse: AGACCAGGTACGGTTAGGACA |
| Axl | Forward: GGAACCCAGGGAATATCACAGG |
| Reverse: AGTTCTAGGATCTGTCCATCTCG |
| CX3CR1 | Forward: GTTATTTGGGCGACATTGTGGC |
| Reverse: CAGACCGAACGTGAAGACGAG |
| VEGF | Forward: CCTTCGTCCTCTCCTTACCC |
| Reverse: AAGCCACTCACACACACAGC |
| α-SMA | Forward: CCCAGACATCAGGGAGTAATGG |
| Reverse: TCTATCGGATACTTCAGCGTCA |
| Col1a1 | Forward: TAAGGGTCCCCAATGGTGAGA |
| Reverse: GGGTCCCTCGACTCCTACAT |
| Col1a2 | Forward: GGTGAGCCTGGTCAAACGG |
| Reverse: ACTGTGTCCTTTCACGCCTTT |
| β-actin | Forward: GACGGCCAGGTCATCACTAT |
| Reverse: CGGATGTCAACGTCACACTT |
